# Supplementary material for: Vasorelaxant Effect of Trachelospermi caulis Extract on Rat Mesenteric Resistance Arteries
Source: MDPI journal article supplement (doi:10.3390/molecules27165300), 2022-08-19

## Supplementary Materials

**Supplementary Figure S1.** Gas Chromatography–Mass Spectrometry (GC/MS) of the Compounds in *T. caulis* Extract

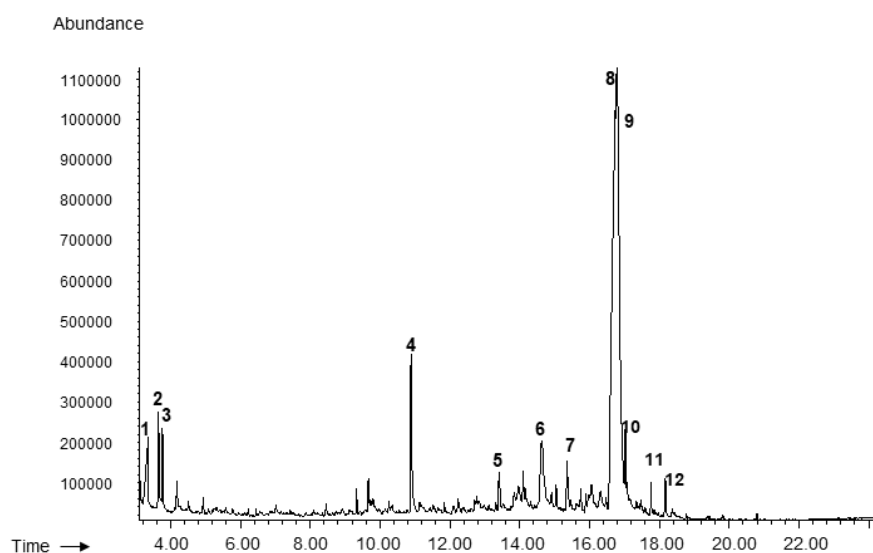

**Supplementary Table S1.** Bioactive compounds detected in *T. caulis* extract.

| Peak | RT (min) | Compound                                                   | Peak Area (%) |
|------|----------|------------------------------------------------------------|---------------|
| 1    | 3.35     | butanoic acid                                              | 3.62          |
| 2    | 3.65     | cyclobutanol                                               | 2.64          |
| 3    | 3.77     | 3-nitropropanoic acid                                      | 1.64          |
| 4    | 10.89    | furan-2-carbaldehyde                                       | 5.13          |
| 5    | 13.41    | 4-hydroxy-3-methoxybenzaldehyde                            | 1.32          |
| 6    | 14.64    | (1R,2S,3S,4R,5R)-6,8-dioxabicyclo[3.2.1]octane-2,3,4-triol | 6.57          |
| 7    | 15.37    | 3-hydroxy-4-methoxybenzoic acid                            | 1.53          |
| 8    | 16.74    | 3,4,5,6-tetrahydroxy-2-methoxyhexanal                      | 30.64         |
| 9    | 16.79    | (3S,4S,5R,6S)-3-methoxy-6-(methoxymethyl)oxane-2,4,5-triol | 38.51         |
| 10   | 17.03    | hexanoic acid                                              | 1.38          |
| 11   | 17.76    | 1-(2,6-dihydroxy-4-methoxyphenyl)butan-1-one               | 0.56          |
| 12   | 18.18    | benzoic acid                                               | 1.07          |

**Supplementary Figure S2. Effect of butyric acid in mesenteric arteries.**

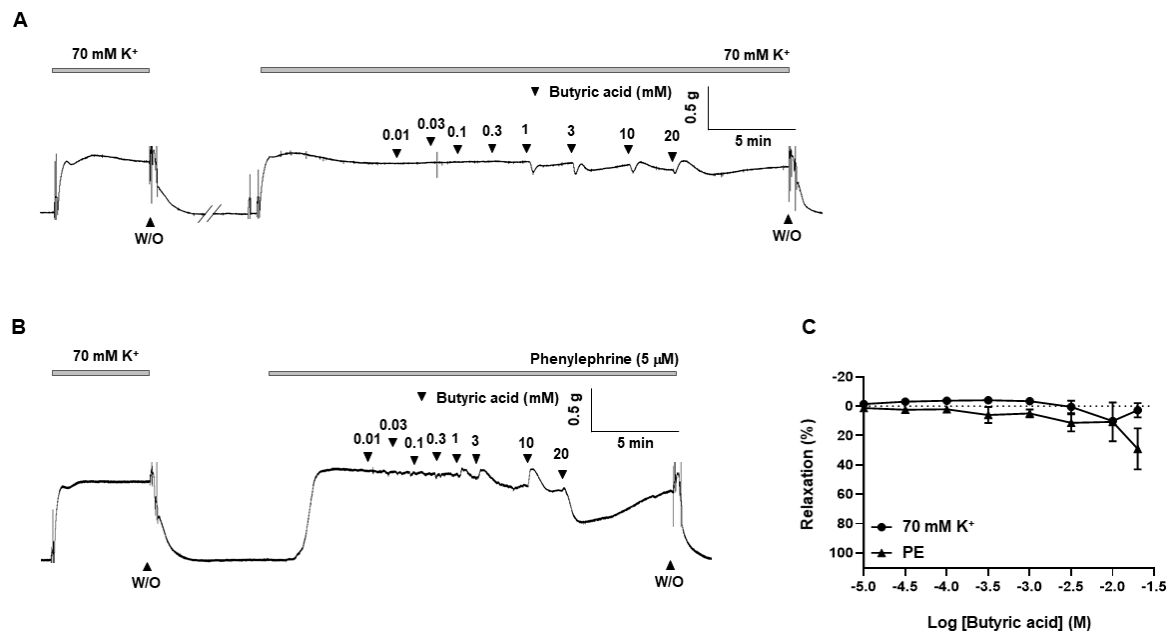

**Supplementary Figure S3. Effect of furfural in mesenteric arteries.**

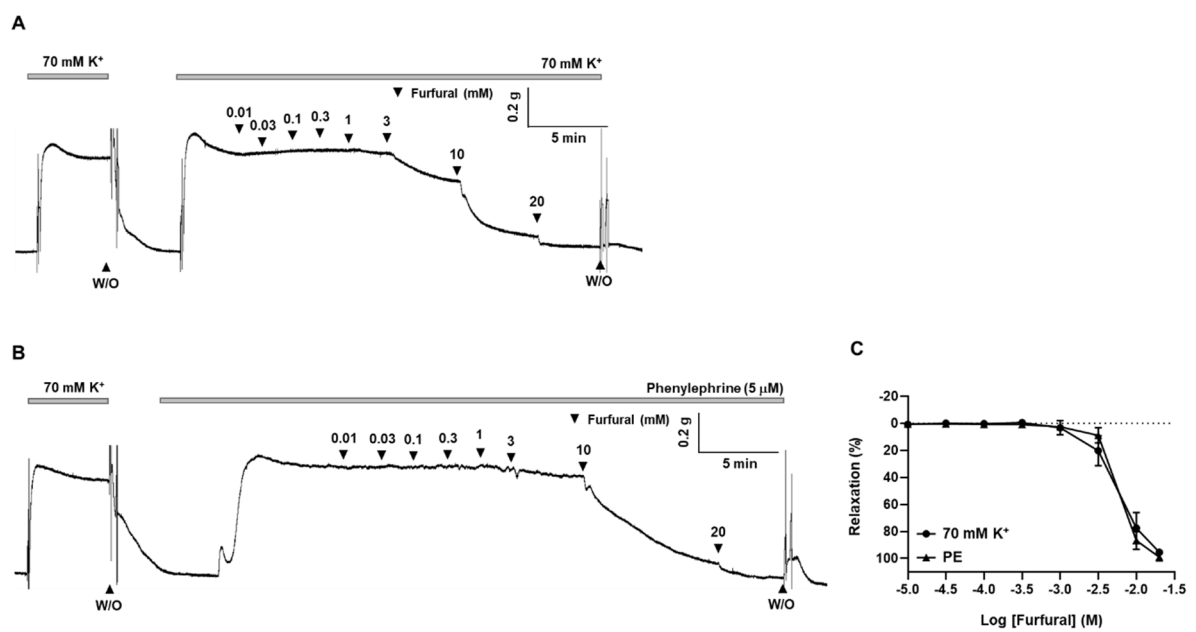

Supplement: s1 [file s1]
